# Supplementary material
Source: PubMed Central journal article supplement (PMC10258866)
Supplement: NIHMS1893501-supplement-Supplementary_Figure_1.pdf [file NIHMS1893501-supplement-Supplementary_Figure_1.pdf]

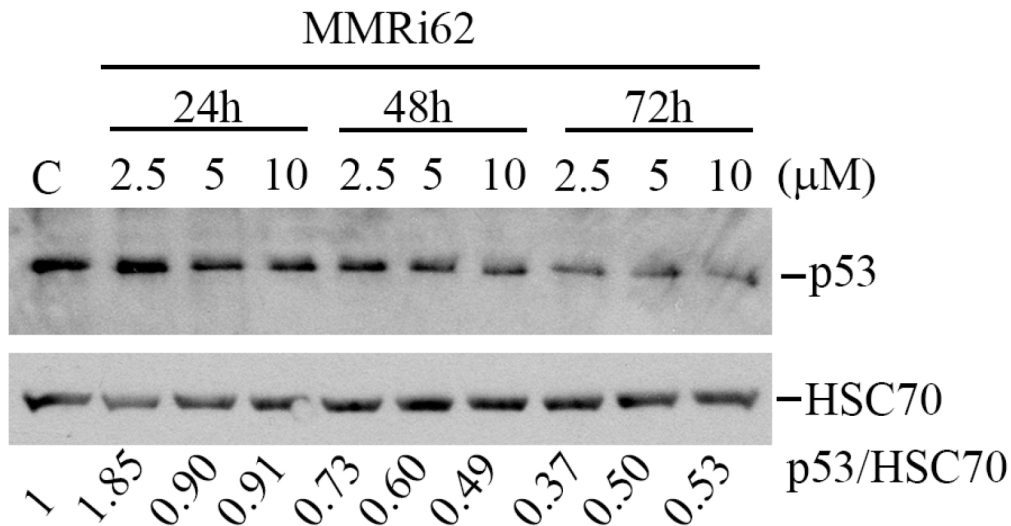

**Supplementary Fig 1.** MMRi62 downregulates wild-type p53 in Capan2 cells. WB analysis p53 showing that MMRi62 downregulates wt-p53 expression in Capan2 cells. Cells were treated with 2.5, 5, 10 μM MMRi62 for 24, 48 and 72h followed by WB with p53 (D0-1 antibody). HSC70 served as a loading control. Relative levels of p53 normalized against HSC70 were indicated at the bottom.
