# Supplementary material
Source: PubMed Central journal article supplement (PMC10258866)
Supplement: NIHMS1893501-supplement-Supplementary_Figure_2.pdf [file NIHMS1893501-supplement-Supplementary_Figure_2.pdf]

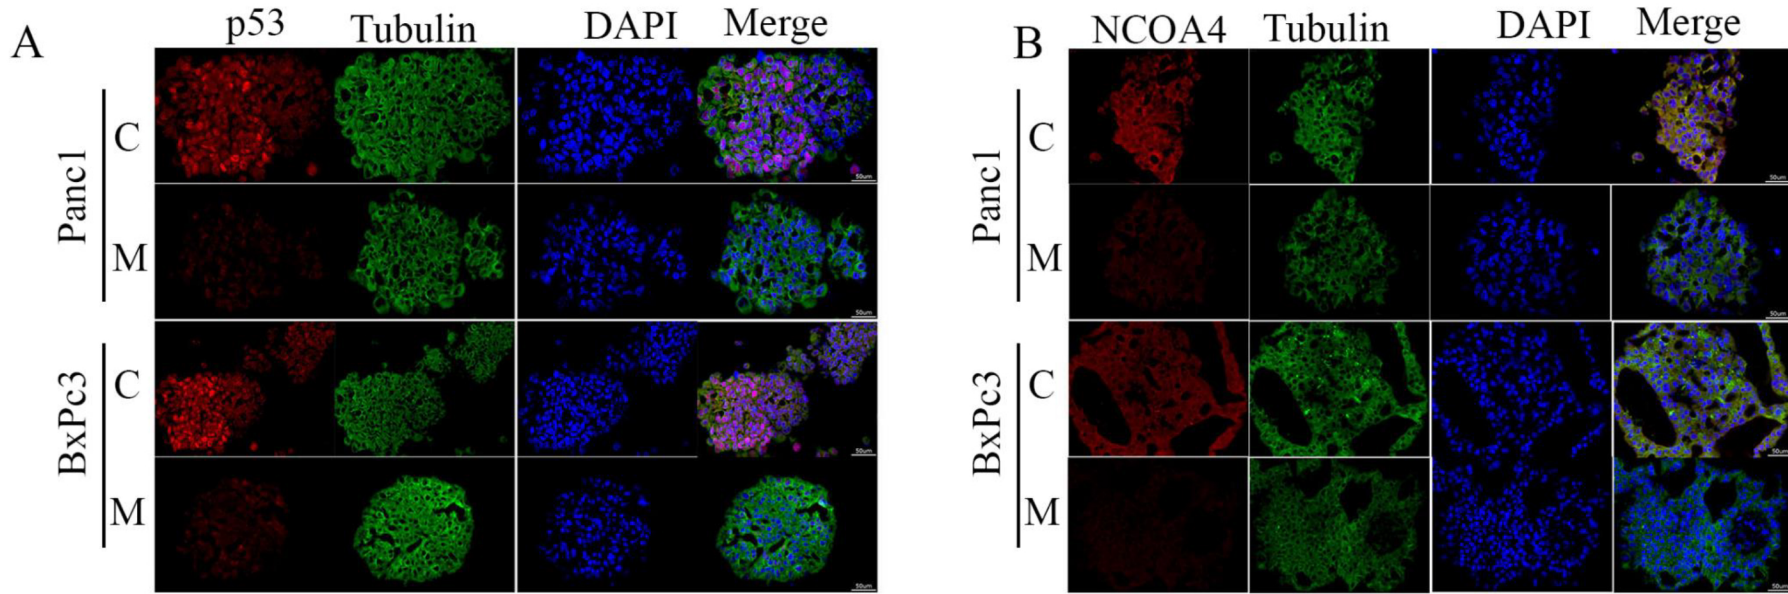

**Supplementary Fig 2.** MMRI62 downregulates p53 and NCOA4 in pancreatic spheroids. **A**, IF staining of p53 and tubulin showing that MMRI62 inhibits p53 expression in DMSO control (C) and 4 $\mu$ M MMRI62-treated (M) Panc1 (Left) and BxPc3 (right) spheroids. MMRI62, continuous exposure for 10 days. **B**, IF staining of NCOA4 and tubulin showing that 4 $\mu$ M MMRI62 inhibits NCOA4 expression in DMSO control (C) and MMRI62-treated (M) Panc1 (Left) and BxPc3 (right). MMRI62, continuous exposure for 10 days.
